# Supplementary material for: Identification of Drug Combinations Containing Imatinib for Treatment of BCR-ABL+ Leukemias
Source: PubMed Central journal article supplement (PMC4100887; doi:10.1371/journal.pone.0102221), 2014-07-16
Supplement: pone.0102221.s001.pdf [file pone.0102221.s001.pdf]

Relative cell survival

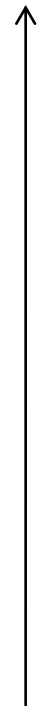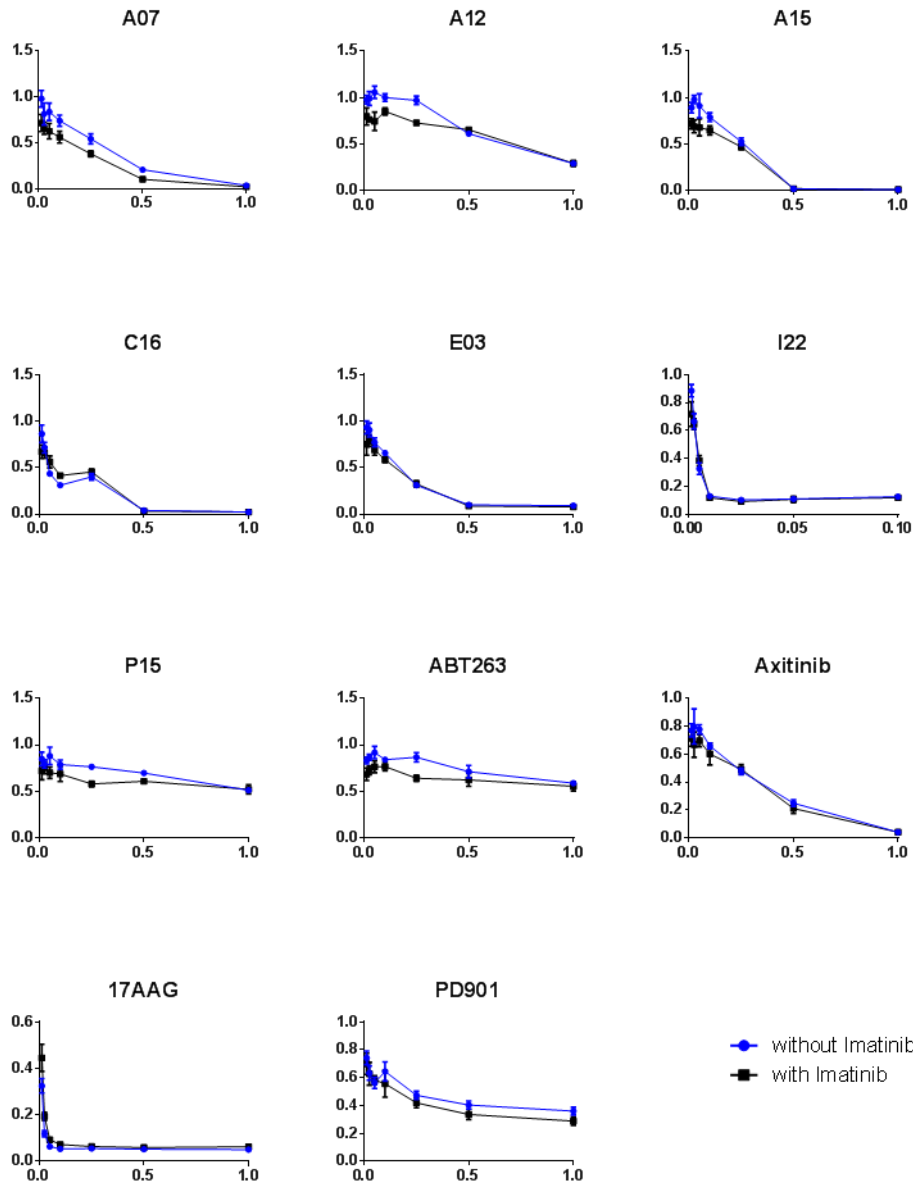

● without Imatinib  
■ with Imatinib

→ Doses ( $\mu\text{M}$ )
